# Supplementary material for: Notas para la Historia del Notariado Catalán
Source: Royal Society of Chemistry journal article supplement (doi:10.1039/d0nr06737g), 1955-01-01
Supplement: d0nr06737g1.pdf [file d0nr06737g1.pdf]

## Electronic Supplementary Information

### **Budded baculoviruses as a receptor display system to quantify ligand binding at single-molecule resolution with TIRF microscopy**

Tõnis Laasfeld ‡,<sup>a</sup> Robin Ehrminger ‡,<sup>a, b</sup> Maris-Johanna Tahk ‡,<sup>a</sup> Karl Rene Kõlvart<sup>a</sup>, Santa Veikšina<sup>a</sup>, Mart Min<sup>b</sup>, Sergei Kopanchuk<sup>‡,a</sup>, Ago Rinken<sup>‡,a</sup>

<sup>a</sup> University of Tartu, Institute of Chemistry, Ravila 14a, 50411, Tartu, Estonia

<sup>b</sup> Tallinn University of Technology, Thomas Johann Seebeck Department of Electronics, Ehitajate Tee 5, 19086, Tallinn, Estonia

‡ Shared first authorship

+ *Shared last authorship and corresponding authors:*

*Dr. Sergei Kopanchuk*

*E-mail:* [sergei.kopanchuk@ut.ee](mailto:sergei.kopanchuk@ut.ee)

*Prof. Ago Rinken*

*E-mail:* [ago.rinken@ut.ee](mailto:ago.rinken@ut.ee)

# SUPPORTING EXPERIMENTAL

## Image analysis and the selection of threshold and sigma

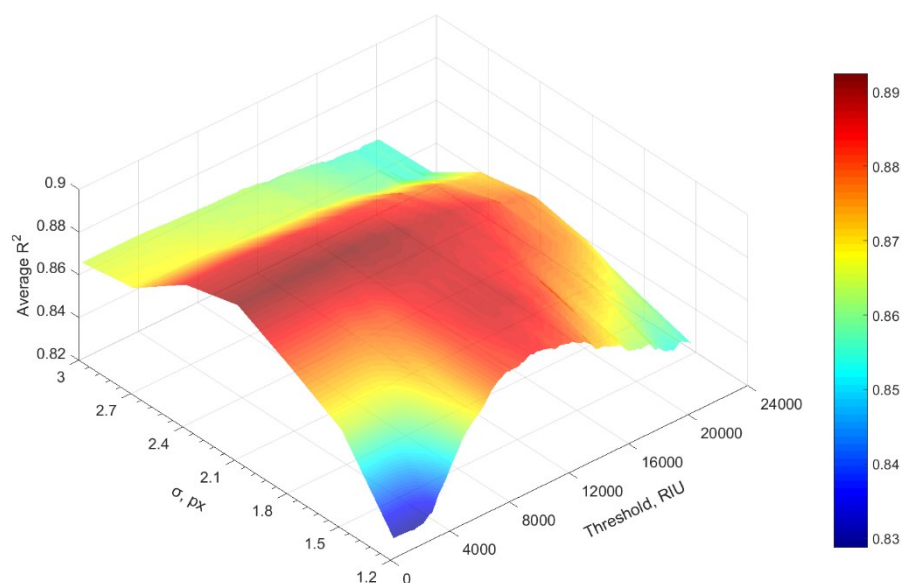

**Fig. S1 Coefficient of determination ( $R^2$ ) dependence on the image analysis parameters.** The spot detection image analysis pipeline parameters sigma and the intensity cutoff threshold were varied and used for the analysis of the entire dataset (twelve competition binding experiments, three  $Y_1R$ , and three UR-MC026 saturation binding experiments). The corresponding models (three parameter logistic function for competition binding and one site total and nonspecific binding model for saturation binding) were used for calculating the  $R^2$  value for data from each experiment. The average  $R^2$  obtained by averaging the  $R^2$  values from all 20 experiments.

### Saturation binding assay with FA

Global fitting of the data from both binding isotherms was analysed as previously in<sup>1</sup>, resulted in the apparent  $K_d \pm \text{SEM}$  value of  $120 \pm 30 \text{ pM}$  and estimated receptor stock concentration after extrusion  $R_{\text{stock}} \pm \text{SEM}$  of  $70 \pm 4 \text{ nM}$ .

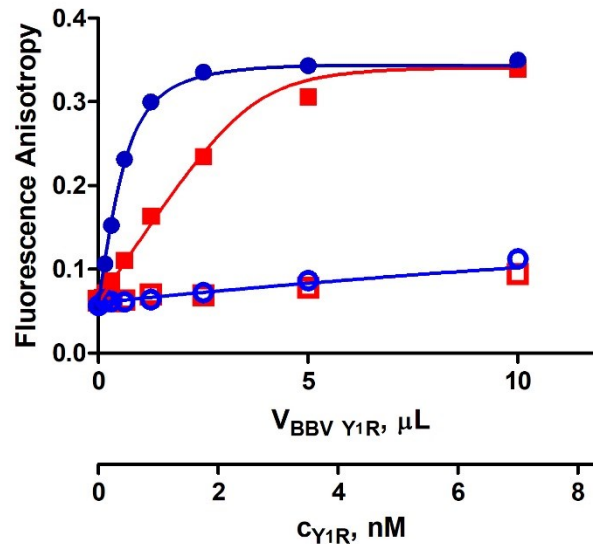

**Fig. S2 The equilibrium binding curves of UR-MC026 to the  $Y_1R$ .** Fixed concentration of 0.5 nM (circles), 3 nM (squares) fluorescent UR-MC026 were incubated with the increasing amount of the  $Y_1R$  receptor budded baculovirus preparation (0 - 10  $\mu\text{L}$ /well, as indicated on the upper x-axis) in the absence (filled symbol, total binding) or presence (open symbols, nonspecific binding) of 0.5  $\mu\text{M}$  or 3  $\mu\text{M}$  non-labeled UR-MK299. Fluorescence intensities were measured, and the background was corrected, and anisotropy values were calculated as previously described by<sup>1</sup>. The lines correspond to the global fit of the binding data as described by<sup>1</sup>. This is a representative graph from two separate experiments performed in duplicates, and the results are presented as mean  $\pm$  SEM.

## Competition binding assay with FA

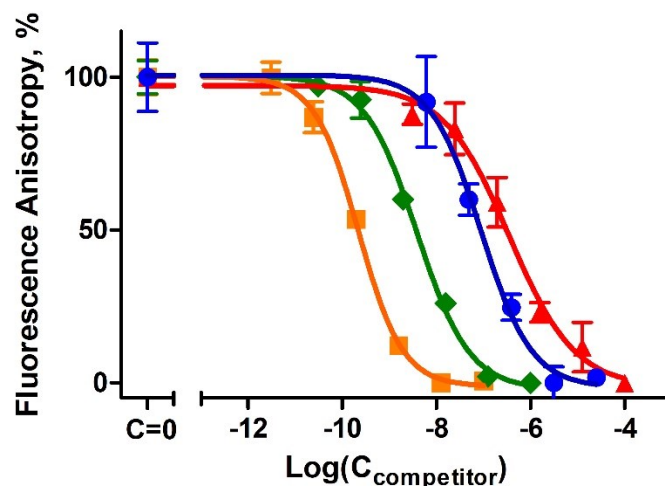

**Fig. S3 Inhibition of UR-MC026 binding to Y<sub>1</sub>R by different ligands measured in FA assay.**

Different concentrations of Y<sub>1</sub>R ligands UR-MK299 (□), BIBO3304 (◆), pNPY (●), PYY (▲) together with 0.5 nM UR-MC026, 50 nM neutravidin and 50 nM biotin-PEG-cholesterol were incubated with BBV preparation (0.32 nM Y<sub>1</sub>R). The lines represent the three parameter logistic function fit and the data presented are from representative competition binding experiments from three independent experiments that were performed in duplicates. Data are normalised so that 100 % is FA without any competitor, and 0 % is the lowest FA value for each competitor separately. Error bars represent SEM of measurements performed in duplicates.

## References

- 1 S. Veiksina, S. Kopanchuk and A. Rinken, *Biochim. Biophys. Acta - Biomembr.*, 2014, **1838**, 372–381.
